# Supplementary material for: The effects of financial incentives for case finding for depression in patients with diabetes and coronary heart disease: interrupted time series analysis
Source: HighWire-hosted journal article supplement (doi:10.1136/bmjopen-2014-005178), 2014-08-01
Supplement: bmjopen-2014-005178supp.pdf [file bmjopen-2014-005178supp.pdf]

## Electronic Web Appendix; clinical codes for each outcome measure

Table 1

Clinical codes for the diagnosis of depression recognised by the UK Quality and Outcomes Framework

| Descriptor                                                   | Clinical code |
|--------------------------------------------------------------|---------------|
| [X] Depression recurrent: [unspecified] or [monopolar NOS]   | Eu33z         |
| [X](Depressn: [episode unsp][NOS (& react)][depress dis NOS] | Eu32z         |
| [X]Depress with psych sympt: [recurr: (named vars)][endogen] | Eu333         |
| [X]Depression: [oth episode][atypic][single epis masked NOS] | Eu32y         |
| [X]Depressive episode, unspecified                           | XE1Zb         |
| [X]Depressn, no psych symp: [recurr: (named var)][endogen]   | Eu332         |
| [X]Mild depressive episode                                   | Eu320         |
| [X]Moderate depressive episode                               | Eu321         |
| [X]Other depressive episodes                                 | XE1Za         |
| [X]Recurr depress disorder cur epi severe without psyc sympt | XE1Zd         |
| [X]Recurrent depress disorder cur epi severe with psyc symp  | XE1Ze         |
| [X]Recurrent depressive disorder, current episode moderate   | Eu331         |
| [X]Recurrent depressive disorder, unspecified                | XE1Zf         |
| [X]Sev depress epis + psych symp:(& singl epis [named vars]) | Eu323         |
| [X]Sev depress epis, no psych: (& single [agit][maj][vital]) | Eu322         |
| [X]Severe depressive episode with psychotic symptoms         | XE1ZZ         |
| [X]Severe depressive episode without psychotic symptoms      | XE1ZY         |
| [X]Single episode agitated depressn w/out psychotic symptoms | XaCHr         |
| [X]Single episode major depression w/out psychotic symptoms  | XaCHs         |
| Agitated depression                                          | X00SQ         |
| Atypical depressive disorder                                 | E11y2         |
| Chronic depression                                           | E2B1.         |
| Cotard syndrome                                              | XSKr7         |
| Depression NOS                                               | XaB9J         |
| Depression: [reactive (neurotic)] or [postnatal]             | XE1aY         |
| Depression: [single maj episode][agit][endogen (& 1st epis)] | E112.         |
| Depressive disorder                                          | X00SO         |
| Depressive disorder NEC                                      | E2B..         |

|                                                               |       |
|---------------------------------------------------------------|-------|
| Endogenous depression                                         | X00SR |
| Endogenous depression - recurrent                             | XM1GC |
| Endogenous depression first episode                           | X00SS |
| Major depressive disorder                                     | XSEGJ |
| Masked depression                                             | X00SU |
| Mild depression                                               | XaClS |
| Mild major depression                                         | XSGok |
| Mixed anxiety and depressive disorder                         | X00Sb |
| Moderate depression                                           | XaClT |
| Moderate major depression                                     | XSGol |
| Post-schizophrenic depression                                 | X00S8 |
| Reactive depression                                           | XE1YC |
| Reactive depressive psychosis                                 | E130. |
| Recurrent brief depressive disorder                           | Xa0wV |
| Recurrent depression                                          | E1137 |
| Recurrent depression: [major episode] or [endogenous]         | E113. |
| Recurrent major depressive episode NOS                        | E113z |
| Recurrent major depressive episodes                           | XE1Y1 |
| Recurrent major depressive episodes, in full remission        | E1136 |
| Recurrent major depressive episodes, mild                     | E1131 |
| Recurrent major depressive episodes, moderate                 | E1132 |
| Recurrent major depressive episodes, severe, no psychosis     | E1133 |
| Recurrent major depressive episodes, severe, with psychosis   | E1134 |
| Recurrent major depressive episodes, unspecified              | E1130 |
| Recurrent major depressive episodes, partial/unspec remission | E1135 |
| Seasonal affective disorder                                   | X761L |
| Severe depression                                             | XaClu |
| Severe major depression with psychotic features               | XSGon |
| Severe major depression without psychotic features            | XSGom |
| Single major depressive episode                               | XE1Y0 |
| Single major depressive episode NOS                           | E112z |
| Single major depressive episode, in full remission            | E1126 |
| Single major depressive episode, mild                         | E1121 |
| Single major depressive episode, moderate                     | E1122 |
| Single major depressive episode, partial or unspec remission  | E1125 |
| Single major depressive episode, severe, with psychosis       | E1124 |

|                                                            |       |
|------------------------------------------------------------|-------|
| Single major depressive episode, severe, without psychosis | E1123 |
| Single major depressive episode, unspecified               | E1120 |

Table 2

Clinical codes for the diagnosis of depression not recognised by the UK Quality and Outcomes Framework

| <b>Descriptor</b>                                   | <b>Clinical code</b> |
|-----------------------------------------------------|----------------------|
| Anxiety with depression                             | Y5448                |
| Depressed mood                                      | XE0re                |
| Symptoms of depression                              | XaLmU                |
| C/O - feeling depressed                             | XM0CR                |
| O/E - depressed                                     | 2257                 |
| [X]Recurrent depressive disorder                    | XE1Zc                |
| Depression medication review                        | XaK6e                |
| Depression annual review                            | XaK6d                |
| Depression interim review                           | XaK6f                |
| On depression register                              | XaJWh                |
| Depression monitoring administration                | XaMGL                |
| Depression monitoring first letter                  | XaMGN                |
| Depression monitoring second letter                 | XaMGO                |
| Depression monitoring third letter                  | XaMGP                |
| Patient given advice about management of depression | XaKEz                |
| Depression worse in morning                         | 761J                 |
| Depression management programme                     | Xaltx                |
| Depression screen                                   | Y6303                |
| Depression screening                                | 6891.                |
| [X]Other mood affective disorders                   | Eu3y.                |
| [X]Other persistent mood affective disorders        | Eu34y                |
| [X]Other recurrent mood affective disorders         | XE1Zh                |
| [X]Other single mood affective disorders            | XE1Zg                |
| [X]Other specified mood affective disorders         | Eu3yy                |
| [X]Persistent mood affective disorder, unspecified  | Eu34z                |
| [X]Persistent mood affective disorders              | Eu34.                |
| [X]Unspecified mood affective disorder              | XE1Zi                |

|                                       |       |
|---------------------------------------|-------|
| Adjustment reaction with anxious mood | E2924 |
| Crying associated with mood           | XM0Ar |
| Cyclic mood swings                    | XaAyL |
| Blunting of mood                      | Xa00z |
| Diurnal variation of mood             | X761I |
| Dysphoric mood                        | XaKUk |
| Mood disorder                         | XE1Xy |
| Moody                                 | Xa3Xf |
| Moody after illness                   | Y4284 |
| Moody before illness                  | Y4236 |

Table 3

Antidepressant drugs

| <b>Drug Class</b>                               | <b>Drugs included in search</b>                                                     | <b>Drugs excluded from search (and rationale)</b>                                                       |
|-------------------------------------------------|-------------------------------------------------------------------------------------|---------------------------------------------------------------------------------------------------------|
| Selective serotonin reuptake inhibitors (SSRIs) | Citalopram<br>Escitalopram<br>Fluoxetine<br>Fluvoxamine<br>Paroxetine<br>Sertraline |                                                                                                         |
| Tricyclic and related antidepressants           | Clomipramine<br>Dosulepin<br>Doxepin<br>Lofepramine<br>Trimipramine                 | Amitriptyline (neuropathic pain)<br>Nortriptyline (neuropathic pain)<br>Imipramine (nocturnal enuresis) |
| Monoamine oxidase inhibitors (MAOIs)            | Phenelzine<br>Isocarboxazid<br>Tranylcypromine<br>Moclobemide                       |                                                                                                         |
| Other antidepressant                            | Mirtazipine                                                                         | Duloxetine (Stress incontinence or                                                                      |

|       |                                                        |                                                 |
|-------|--------------------------------------------------------|-------------------------------------------------|
| drugs | Venlafaxine<br>Agomelatine<br>Tryptophan<br>Reboxetine | diabetic neuropathy)<br>Flupentixol (psychoses) |
|-------|--------------------------------------------------------|-------------------------------------------------|
